# Supplementary material for: Bilirubin-based decision-making for MRCP use in acute biliary pancreatitis: a retrospective cohort study
Source: Research Square preprint supplement (doi:10.21203/rs.3.rs-8581696/v1), 2026-02-17
Supplement: Supplementary file 1 [file 3fee4b39d9bbe033cd2ead21.docx]

**Table 5:** Comparison of age, BMI, Charlson comorbidity index, and length of hospital stay between groups

|  | | **Group 1**  **(n=105)** | **Group 2**  **(n=42)** | *b****p*** |
| --- | --- | --- | --- | --- |
| ***Age (years)*** | *Mean±SD* | 53.83±17.23 | 56.62±19.12 | ***0.392*** |
| ***BMI (kg/m2)*** | *Mean±SD* | 28.74±5.21 | 27.30±4.46 | ***0.127*** |
| ***Charlson Comorbidity Index*** | *Mean±SD* | 1.88±1.96 | 2.57±2.23 | ***0.069*** |
| ***Hospital stays (days)*** | *Mean±SD* | 4.66±2.45 | 5.29±2.57 | ***0.169*** |

*bMann Whitney U Test*
