# Supplementary material for: Bilirubin-based decision-making for MRCP use in acute biliary pancreatitis: a retrospective cohort study
Source: Research Square preprint supplement (doi:10.21203/rs.3.rs-8581696/v1), 2026-02-17
Supplement: Supplementary file 2 [file 68041ba51a2fa022d2503182.docx]

**Tablo 3:** The bilirubin cut-off values

|  | Sensitivity | Specificity | 1- Specificity | Youden J |
| --- | --- | --- | --- | --- |
| T.BIL ≥ 2.02 | 0.980 | 0.028 | 0.978 | 0.008 |
| T.BIL ≥ 3.06 | 0.784 | 0.243 | 0.757 | 0.027 |
| **T.BIL ≥ 3.78** | **0.706** | **0.411** | **0.589** | **0.117** |
| T.BIL ≥ 4.02 | 0.608 | 0.449 | 0.551 | 0.056 |
| T.BIL ≥ 5.05 | 0.353 | 0.664 | 0.336 | 0.016 |
| T.BIL ≥ 5.61 | 0.235 | 0.785 | 0.215 | 0.020 |
| D.BIL ≥ 1.08 | 0.941 | 0.112 | 0.88 | 0.053 |
| D.BİL ≥ 2.05 | 0.706 | 0.336 | 0.664 | 0.051 |
| **D.BIL ≥ 2.80** | **0.549** | **0.561** | **0.439** | **0.110** |
| D.BIL ≥ 3.04 | 0.490 | 0.589 | 0.411 | 0.079 |
| D.BIL ≥ 4.04 | 0.216 | 0.794 | 0.206 | 0.010 |
