# Supplementary material for: Bilirubin-based decision-making for MRCP use in acute biliary pancreatitis: a retrospective cohort study
Source: Research Square preprint supplement (doi:10.21203/rs.3.rs-8581696/v1), 2026-02-17
Supplement: Supplementary file 3 [file 6bf18ca0d6d76bad12380441.docx]

**Table 2:** The diagnostic efficacy of MRCP

| **MRCP (n=158)** |  |
| --- | --- |

Sensitivity %95.45 (%84.53-99.44)

Specificty %98.13 (%93.41-99.77)

PPV %95.45 (%84.16-98.81)

NPV %98.13 (%93.13-99.51)

Accuracy %97.35 (%93.36-99.27)

Percentages in parentheses - 95% confidence interval, PPV: Pozitive predictive value, NPV: Negatif predictive value
