# Supplementary material for: Bilirubin-based decision-making for MRCP use in acute biliary pancreatitis: a retrospective cohort study
Source: Research Square preprint supplement (doi:10.21203/rs.3.rs-8581696/v1), 2026-02-17
Supplement: Supplementary file 4 [file 9be2b8a1777d31db4dc93275.docx]

|  | | **Group 1**  **(n=105)** | | **Group 2**  **(n=42)** | | ***aP*** |
| --- | --- | --- | --- | --- | --- | --- |
| **n** | **%** | **n** | **%** |
| ***Severity of pancreatitis*** | *Mild* | 78 | 74.3 | 34 | 81.0 | ***0.528*** |
| *Moderate* | 25 | 23.8 | 8 | 19.0 |
| *Severe* | 2 | 1.9 | 0 | 0.0 |

**Table 4:** Assessment of the severity of pancreatitis based on the groups
