# Supplementary material for: Bilirubin-based decision-making for MRCP use in acute biliary pancreatitis: a retrospective cohort study
Source: Research Square preprint supplement (doi:10.21203/rs.3.rs-8581696/v1), 2026-02-17
Supplement: Supplementary file 5 [file a8bdabffa41c390decee649e.docx]

**Table 1:** The demographic, laboratory, and clinical characteristics of the patients enrolled in the study.

|  | | **n** | **%** |
| --- | --- | --- | --- |
| **Gender** | *Female* | 85 | 53.8 |
| *Male* | 73 | 46.2 |
| ***Severity of pancreatitis*** | *Mild* | 123 | 77.8 |
| *Moderate* | 33 | 20.9 |
| *Severe* | 2 | 1.3 |
|  | | **Mean±SD** | **Min-Max (Average)** |
| ***Age (years)*** | | 55.17±18.16 | 20-90 (55.5) |
| ***BMI*** *(kg/m2)* | | 28.21±4.99 | 17.3-48.83 (27.64) |
| ***Charlson Comorbidity Index*** | | 2.13±2.13 | 0-8 (2) |
| ***T.Bil (mg/dL)*** | | 4.4±2.9 | 0.29-25.8 (3.98) |
| ***D.Bil (mg/dL)*** | | 2.74±2.24 | 0.06-22.1 (2.37) |
| ***CRP (mg/L)*** | | 5.41±7.07 | 0.1-34.07 (2.5) |
| ***HCT (%)*** | | 39.39±4.78 | 25.9-51.4 (39.5) |
| ***ERCP timing (hours)*** | | 62.38±35.81 | 6-192 (54) |
| ***Hospital stay (day)*** | | 4.85±2.52 | 2-15 (4) |
